# Supplementary material
Source: PubMed Central journal article supplement (PMC5833514)
Supplement: jamainternmed-178-55-s001.pdf [file jamainternmed-178-55-s001.pdf]

## Supplementary Online Content

Fralick M, Kesselheim AS, Avorn J, Schneeweiss S. Use of health care databases to support supplemental indications of approved medications. *JAMA Intern Med*. Published online November 20, 2017. doi:10.1001/jamainternmed.2017.3919

**eTable 1.** Covariate Definitions

**eTable 2.** Additional Baseline Characteristics

**eAppendix.** Methodology for Selecting Telmisartan

This supplementary material has been provided by the authors to give readers additional information about their work.

**eTable 1. Covariate definitions**

| <b>Covariate</b>                                                                           | <b>Description</b>                                                                                                                                                                                                                                                                                                                                                                                                                                                                                                                                                                |
|--------------------------------------------------------------------------------------------|-----------------------------------------------------------------------------------------------------------------------------------------------------------------------------------------------------------------------------------------------------------------------------------------------------------------------------------------------------------------------------------------------------------------------------------------------------------------------------------------------------------------------------------------------------------------------------------|
| Obese                                                                                      | 278.00, 649.1, 649.10, 649.11, 649.12, 649.13, 649.14, 649.2, 649.20, 649.21, 649.22, 649.23, 649.24, V85.3, V85.30, V85.31, V85.32, V85.33, V85.34, V85.35, V85.36, V85.37, V85.38, V85.39, V85.4, V85.41, V85.42, V85.43, V85.44, V85.45, 539, 539.0, 539.01, 539.09, 539.8, 539.81, 539.89<br><br>OR<br><br>Any of: ORLISTAT, PHENTERMINE HCL, PHENTERMINE HCL/TOPIRAMATE, DIETHYLPROPION HCL, PHENDIMETRAZINE TARTRATE, BENZPHETAMINE HCL, SIBUTRAMINE HCL M-HYDRATE<br>HCPCS/PROC_CD Procedure Code is any of: 43644, 43645, 43770, 43842, 43843, 43845, 43846, 43847, 43999 |
| Smoking                                                                                    | V15.82, 305.1x, 649.0x, 989.84<br>OR<br>use of varenicline tartrate or nicotine replacement therapy<br>OR<br>CPT code<br>99406, 99407, S9075, S9453                                                                                                                                                                                                                                                                                                                                                                                                                               |
| <b>Diabetes severity</b>                                                                   |                                                                                                                                                                                                                                                                                                                                                                                                                                                                                                                                                                                   |
| Diabetes mellitus without mention of complications                                         | 250.0x                                                                                                                                                                                                                                                                                                                                                                                                                                                                                                                                                                            |
| Diabetic nephropathy                                                                       | 250.4x, 583.81                                                                                                                                                                                                                                                                                                                                                                                                                                                                                                                                                                    |
| Diabetic neuropathy                                                                        | 250.6x, 357.2x                                                                                                                                                                                                                                                                                                                                                                                                                                                                                                                                                                    |
| Diabetes with peripheral circulatory disorders                                             | 250.7x                                                                                                                                                                                                                                                                                                                                                                                                                                                                                                                                                                            |
| Diabetes with unspecified complications                                                    | 250.9, 250.90, 250.92                                                                                                                                                                                                                                                                                                                                                                                                                                                                                                                                                             |
| <b>Other comorbidities</b>                                                                 |                                                                                                                                                                                                                                                                                                                                                                                                                                                                                                                                                                                   |
| Hypertension                                                                               | 401.xx-405.xx                                                                                                                                                                                                                                                                                                                                                                                                                                                                                                                                                                     |
| Hyperlipidemia                                                                             | 272.0, 272.2, 272.4                                                                                                                                                                                                                                                                                                                                                                                                                                                                                                                                                               |
| Congestive heart failure                                                                   | 428.xx, 398.91, 402.01, 402.11, 402.91, 404.01, 404.11, 404.91, 404.03, 404.13, 404.93                                                                                                                                                                                                                                                                                                                                                                                                                                                                                            |
| Ischemic heart disease                                                                     | 410.xx-411.0, 411.81, 412<br>429.7,414*                                                                                                                                                                                                                                                                                                                                                                                                                                                                                                                                           |
| Acute myocardial infarction                                                                | 410*, 411.0, 411.81                                                                                                                                                                                                                                                                                                                                                                                                                                                                                                                                                               |
| Angina                                                                                     | 413.** 411.**                                                                                                                                                                                                                                                                                                                                                                                                                                                                                                                                                                     |
| History of coronary artery bypass graft (CABG) or percutaneous coronary intervention (PCI) | 36.1* 36.2, 33510, 33511, 33512, 33513, 33514, 33516, 33517, 33518, 33519, 33520, 33521, 33522, 33523, 33530, 33534, 33534, 33536, 33545, 33572<br><br>36.01, 36.02, 36.03, 36.05, 36.09<br><br>92920, 92921, 92924, 92925, 92937, 92938, 92941, 92943, 92944, 92973, 92982, 92984, 92995, 92996 00.66<br>V45.82                                                                                                                                                                                                                                                                  |
| Peripheral vascular disease                                                                | 440.20 - 440.24, 440.29 – 440.32, 440.3, 443.9                                                                                                                                                                                                                                                                                                                                                                                                                                                                                                                                    |
| Atrial fibrillation                                                                        | 427.3x                                                                                                                                                                                                                                                                                                                                                                                                                                                                                                                                                                            |
| Ischemic stroke                                                                            | 433.x1, 434.x1, 434.9, 436.xx                                                                                                                                                                                                                                                                                                                                                                                                                                                                                                                                                     |

|                                                |                                                                                                                                                                                                                                                         |
|------------------------------------------------|---------------------------------------------------------------------------------------------------------------------------------------------------------------------------------------------------------------------------------------------------------|
| Hemorrhagic stroke                             | 430.xx, 431.xx                                                                                                                                                                                                                                          |
| Transient ischemic attack (TIA)                | 435.xx (not 435.2)                                                                                                                                                                                                                                      |
| Chronic obstructive pulmonary disease          | 491.xx, 492.xx, or 496.xx                                                                                                                                                                                                                               |
| Asthma                                         | 493.xx                                                                                                                                                                                                                                                  |
| Obstructive sleep apnea                        | 327.23                                                                                                                                                                                                                                                  |
| Pneumonia                                      | 480.xx – 486.xx, 487.0x, 507.xx                                                                                                                                                                                                                         |
| Other renal disease (non-diabetic)             | 580.xx-587.xx, 403.xx, 404.xx, 572.4x, 791.2x, 791.3x, 274.10, 440.1x, 442.1x, 453.3x, 593.xx, 753.0x, 753.3x, 866.00, 866.01, 866.1x,                                                                                                                  |
| Sepsis/Septicemia                              | 995.91, 995.92, 038.xx                                                                                                                                                                                                                                  |
| Osteoarthritis                                 | 715.xx                                                                                                                                                                                                                                                  |
| Depression                                     | 293.83, 296.2x, 296.3x, 298.0x, 300.4x, 309.0x, 309.1x, 309.28, 311.xx                                                                                                                                                                                  |
| Anxiety                                        | 293.84, 300.0x, 300.2x, 300.3x, 309.24, 308.0x, 309.81                                                                                                                                                                                                  |
| Sleep disorder                                 | 307.4x, 327.0x, 327.2x 780.5x, 347.xx                                                                                                                                                                                                                   |
| Dementia (and related)                         | 290.xx, 294.xx, 330.xx, 331.xx                                                                                                                                                                                                                          |
| Urinary incontinence                           | 788.3x, 788.91                                                                                                                                                                                                                                          |
| <b>Other medications</b>                       |                                                                                                                                                                                                                                                         |
| Angiotensin converting enzyme inhibitors (ACE) | Benazepril, captopril, enalapril, fosinopril, lisinopril, moexipril, perindopril, quinapril, ramipril, trandolapril                                                                                                                                     |
| Angiotensin receptor blocker (ARB)             | Azilsartan, candesartan, eprostatan, irbesartan, losartan, olmesartan, telmisartan, valsartan                                                                                                                                                           |
| Beta blockers                                  | Acebutolol, atenolol, betaxolol, bisoprolol, carteolol, carvedilol, esmolol, labetalol, metoprolol tartrate, metoprolol succinate, propranolol, penbutolol, pindolol, nadolol, nebivolol, sotalol, timolol                                              |
| Calcium channel blockers                       | Diltiazem Mibefradil Verapamil Amlodipine Clevidipine Bepridil Felodipine Isradipine Nicardipine Nifedipine Nimodipine Nisoldipine Amlodipine–atorvastatin                                                                                              |
| Thiazides                                      | Bendroflumethiazide Chlorothiazide Chlorthalidone Hydrochlorothiazide Hydroflumethiazide Indapamide Methyclothiazide Metolazone Polythiazide Trichlormethiazide                                                                                         |
| Loop diuretics                                 | furosemide, bumetanide, torsemide, ethacrynic acid                                                                                                                                                                                                      |
| Other diuretics                                | Amiloride, eplerenone, spironolactone, triamterene                                                                                                                                                                                                      |
| Nitrates                                       | Nitroglycerin, isosorbide dinitrate, isosorbide mononitrate                                                                                                                                                                                             |
| Digoxin                                        | Digoxin                                                                                                                                                                                                                                                 |
| Antiarrhythmics                                | Amiodarone, dronedarone, flecainide, ibutilide, procainamide, propafenone, quinidine disopyramide, dofetilide, mexiletine, moricizine, tocainide                                                                                                        |
| COPD/asthma meds                               | Fluticasone/salmeterol, budesonide/formoterol, mometasone/formoterol, arformoterol, formoterol, salmeterol, albuterol, levalbuterol, metaproterenol, pirbuterol, terbutaline, ipratropium, tiotropium, theophylline, montelukast, zafirlukast, zileuton |
| Statins                                        | Atorvastatin, fluvastatin, lovastatin, pravastatin, simvastatin, rosuvastatin, lovastatin–niacin, ezetimibe–simvastatin, pravastatin- aspirin, pitavastatin                                                                                             |
| Other lipid-lowering drugs                     | Niacin Niacinamide Fenofibrate Gemfibrozil Cholestyramine Colestipol Ezetimibe                                                                                                                                                                          |
| Oral anticoagulant                             | Warfarin, dabigatran, rivaroxaban, apixaban                                                                                                                                                                                                             |
| Heparins                                       | Heparin, dalteparin, enoxaparin, tinzaparin                                                                                                                                                                                                             |
| Antiplatelets                                  | Aspirin, clopidogrel, prasugrel, ticlopidine, aspirin–dipyridamole, dipyridamole alone, cilostazol, ticagrelor                                                                                                                                          |
| NSAIDs                                         | Diclofenac etodolac flurbiprofen ketorolac ibuprofen indomethacin meloxicam naproxen piroxicam sulindac                                                                                                                                                 |
| Cox-2 inhibitors                               | Celecoxib Rofecoxib valdecoxib                                                                                                                                                                                                                          |
| Opioids (and related)                          | Codeine Fentanyl Hydrocodone Hydromorphone Meperidine Morphine Oxycodone Propoxyphene Oxymorphone Tramadol                                                                                                                                              |

|                                                               |                                                                                                                                                                                                                                                                                                                                                                                                                                                                                                                                                                                                                                                                                                                 |
|---------------------------------------------------------------|-----------------------------------------------------------------------------------------------------------------------------------------------------------------------------------------------------------------------------------------------------------------------------------------------------------------------------------------------------------------------------------------------------------------------------------------------------------------------------------------------------------------------------------------------------------------------------------------------------------------------------------------------------------------------------------------------------------------|
| Oral steroids                                                 | Cortisone hydrocortisone prednisone prednisolone methylprednisolone triamcinolone dexamethasone, bethamethasone                                                                                                                                                                                                                                                                                                                                                                                                                                                                                                                                                                                                 |
| Antidepressants                                               | Paroxetine Citalopram Escitalopram Fluoxetine Fluvoxamine Sertraline Venlafaxine Desvenlafaxine Levomilnacipran Duloxetine Amitriptyline Amoxapine Clomipramine Desipramine Doxepin Imipramine Maprotiline Nortriptyline Protriptyline Trimipramine Bupropion Mirtazapine Nefazodone Trazodone Phenelzine Isocarboxazid Tranylcypromine Vilazodone, Vortioxetine                                                                                                                                                                                                                                                                                                                                                |
| Anticonvulsants                                               | carbamazepine, divalproex, eslicarbazepine, ethotoin, ethosuximide, ezogabine, felbamate, fosphenytoin, gabapentin, lacosamide, lamotrigine, levetiracetam, mephenytoin, mephobarbital, methsuximide, oxcarbazepine, perampanel, phenobarbital, phenytoin, pregabalin, primidone, rufinamide, tiagabine, topiramate, valproic acid, vigabatrin, zonisamide                                                                                                                                                                                                                                                                                                                                                      |
| Antipsychotics                                                | clozapine risperidone olanzapine quetiapine aripiprazole ziprasidone chlorpromazine fluphenazine mesoridazine perphenazine promazine thioridazine trifluoperazine triflupromazine haloperidol loxapine molindone pimozide thiothixene asenapine iloperidone lurasidone paliperidone pimozide propiomazine triflupromazine                                                                                                                                                                                                                                                                                                                                                                                       |
| Benzodiazepines                                               | Alprazolam Chlordiazepoxide Clonazepam Clorazepate Diazepam Estazolam Flurazepam Halazepam Lorazepam Midazolam Oxazepam Quazepam Temazepam Triazolam                                                                                                                                                                                                                                                                                                                                                                                                                                                                                                                                                            |
| Use of anxiolytics/hypnotics                                  | Eszopiclone Zaleplon Zolpidem Chloral hydrate Diphenhydramine Doxylamine Ethchlorvynol Glutethimide Methaqualone buspirone hydroxyzine meprobamate                                                                                                                                                                                                                                                                                                                                                                                                                                                                                                                                                              |
| Antiparkinsonian meds                                         | Benzotropine biperiden procyclidine trihexyphenidyl tolcapone amantadine levodopa pergolide pramixepole ropinirole rotigotine carbidopa/levodopa rasagiline                                                                                                                                                                                                                                                                                                                                                                                                                                                                                                                                                     |
| Bisphosphonates                                               | zoledronic acid alendronate sodium alendronate sodium/cholecalciferol (vitamin d3) etidronate disodium ibandronate sodium risedronate sodium risedronate sodium/calcium carbonate pamidronate disodium                                                                                                                                                                                                                                                                                                                                                                                                                                                                                                          |
| <b>Health care utilization</b>                                |                                                                                                                                                                                                                                                                                                                                                                                                                                                                                                                                                                                                                                                                                                                 |
| Emergency department visits                                   | Any visit to an emergency room or urgent care clinic                                                                                                                                                                                                                                                                                                                                                                                                                                                                                                                                                                                                                                                            |
| Visits to primary doctors (internal medicine/family medicine) | 0311, 0312, 0313, 0314, 0316, 0317, 0318, 0319, 0326, 0327, 0329, 0330, 0331, 0332, 0333, 0334, 0335, 0336, 0337, 0338, 0339, 0340, 0341, 0342, 1046, 1113, 1127, 1133, 1419, 1423, 1643, 1646, 1661, 1673, 1694, 1697, 1719, 1721, 1726, 1743, 1755, 1764, 1785, 1790, 1791, 1832, 1854, 1860, 1864, 1865, 1903, 1927, 1940, 2050, 2068, 2073, 2189, 2208, 2219, 2228, 2233, 2249, 2254, 2280, 2286, 2313, 2314, 2324, 2340, 2354, 2359, 2373, 2375, 2378, 2384, 2392, 2403, 2446, 2485, 2574, 2607, 2610, 2613, 2614, 2615, 2628, 2644, 2677, 2736, 2790, 2811, 2826, 2835, 2837, 2842, 2889, 2904, 2930, 2978, 2996, 3122, 3150, 3241, 3268, 3350, 3531, 3564, 3765, 3777, 3812, 4135<br><br>240,204,825,845 |
| Total N distinct pharmacological agents prescribed            | Includes generic and brand name medications and also includes some over the counter medications                                                                                                                                                                                                                                                                                                                                                                                                                                                                                                                                                                                                                 |
| <b>Diagnostics</b>                                            |                                                                                                                                                                                                                                                                                                                                                                                                                                                                                                                                                                                                                                                                                                                 |
| Preventive services                                           | Prostate specific antigen test: 84153, 84152 – 84154, G0103<br><br>Colonoscopy<br>45378 45379 45380 45381 45382 45383 45384 45385 45386 45387 45388 45389<br>45390 45391 45392 G0105 45.23<br>Fecal occult blood test G0107 G0328 82270 82274<br><br>Flu shot: 90655 – 90660 90724 G0008 V04.8 V04.81 V06.6                                                                                                                                                                                                                                                                                                                                                                                                     |
| Hemoglobin A1C                                                | 83036                                                                                                                                                                                                                                                                                                                                                                                                                                                                                                                                                                                                                                                                                                           |

|                                                    |                                                                                                                                                                                                                                                                                                                                               |
|----------------------------------------------------|-----------------------------------------------------------------------------------------------------------------------------------------------------------------------------------------------------------------------------------------------------------------------------------------------------------------------------------------------|
| Creatinine                                         | 82565                                                                                                                                                                                                                                                                                                                                         |
| Number of tests for comprehensive metabolic panels | 80053                                                                                                                                                                                                                                                                                                                                         |
| Thyroid function                                   | 84436, 84439, 84443, 84479, 80091, 80092                                                                                                                                                                                                                                                                                                      |
| ECHO                                               | 88.72, 00.24, 93306, 93307, 93308, 93312-93318, 93320, 93321, 93350, 93351, 93355, 93662                                                                                                                                                                                                                                                      |
| <b>OUTCOME</b>                                     |                                                                                                                                                                                                                                                                                                                                               |
| Stroke                                             | Inpatient ICD-9 discharge diagnosis:<br>430.xx Subarachnoid hemorrhage (SAH)<br>431.xx Intracerebral hemorrhage (ICH)<br>433.x1 Occlusion and stenosis of precerebral arteries with cerebral infarction<br>434.x1 Occlusion and stenosis of cerebral arteries with cerebral infarction<br>436.x Acute, but ill-defined cerebrovascular events |
| Heart failure                                      | Inpatient ICD-9 diagnosis<br>428.x, 398.91, 402.01, 402.11, 402.91, 404.01, 404.11, 404.91, 404.03, 404.13, 404.93                                                                                                                                                                                                                            |
| Myocardial infarction                              | Inpatient ICD-9 Dx 410.X (acute myocardial infarction)                                                                                                                                                                                                                                                                                        |
| Angioedema                                         | 277.6<br>995.1                                                                                                                                                                                                                                                                                                                                |

5 digit codes (e.g., 88053) represent Current Procedural Terminology (CPT) or Healthcare Common Procedure Coding (HCPC). The remaining codes are generally International Classification of Disease – 9<sup>th</sup> revision codes (ICD9).

eTable 2. Additional baseline Characteristics.

| Variable                                       | Unmatched population   |                         |       | Propensity-score matched population |                         |       |
|------------------------------------------------|------------------------|-------------------------|-------|-------------------------------------|-------------------------|-------|
|                                                | Ramipril<br>(N=48,053) | Telmisartan<br>(N=4665) | SD    | Ramipril<br>(N=4665)                | Telmisartan<br>(N=4665) | SD    |
| Quarter of Cohort Entry Date                   |                        |                         | 0.046 |                                     |                         | 0.053 |
| ...First Quarter                               | 13,667 (28.4%)         | 1,198 (25.7%)           |       | 1,149 (24.6%)                       | 1,198 (25.7%)           |       |
| ...Second Quarter                              | 10,080 (21.0%)         | 1,038 (22.3%)           |       | 1,005 (21.5%)                       | 1,038 (22.3%)           |       |
| ...Third Quarter                               | 12,730 (26.5%)         | 1,310 (28.1%)           |       | 1,395 (29.9%)                       | 1,310 (28.1%)           |       |
| ...Fourth Quarter                              | 11,576 (24.1%)         | 1,119 (24.0%)           |       | 1,116 (23.9%)                       | 1,119 (24.0%)           |       |
| Mean age                                       |                        |                         | 0.119 |                                     |                         | 0.007 |
|                                                | 68.29 (9.52)           | 69.43 (9.60)            |       | 69.36 (9.67)                        | 69.43 (9.60)            |       |
| Sex                                            |                        |                         | 0.303 |                                     |                         | 0.03  |
| ...Male                                        | 31,940 (66.5%)         | 2,413 (51.7%)           |       | 2,343 (50.2%)                       | 2,413 (51.7%)           |       |
| ...Female                                      | 16,113 (33.5%)         | 2,252 (48.3%)           |       | 2,322 (49.8%)                       | 2,252 (48.3%)           |       |
| Asthma                                         | 1,586 (3.3%)           | 195 (4.2%)              | 0.046 | 173 (3.7%)                          | 195 (4.2%)              | 0.024 |
| Angina                                         | 11,272 (23.5%)         | 815 (17.5%)             | 0.149 | 817 (17.5%)                         | 815 (17.5%)             | 0.001 |
| Chronic obstructive pulmonary disease          | 2,064 (4.3%)           | 155 (3.3%)              | 0.051 | 162 (3.5%)                          | 155 (3.3%)              | 0.008 |
| Type 2 diabetes mellitus                       | 14,375 (29.9%)         | 1,524 (32.7%)           | 0.059 | 1,514 (32.5%)                       | 1,524 (32.7%)           | 0.005 |
| Digoxin                                        | 2,863 (6.0%)           | 240 (5.1%)              | 0.036 | 231 (5.0%)                          | 240 (5.1%)              | 0.009 |
| Heart failure                                  | 7,205 (15.0%)          | 510 (10.9%)             | 0.121 | 526 (11.3%)                         | 510 (10.9%)             | 0.011 |
| Obese                                          | 620 (1.3%)             | 61 (1.3%)               | 0.002 | 66 (1.4%)                           | 61 (1.3%)               | 0.009 |
| Dementia                                       | 1,511 (3.1%)           | 148 (3.2%)              | 0.002 | 153 (3.3%)                          | 148 (3.2%)              | 0.006 |
| Renal disease (non-diabetic)                   | 3,549 (7.4%)           | 545 (11.7%)             | 0.147 | 515 (11.0%)                         | 545 (11.7%)             | 0.02  |
| Acute myocardial infarction                    | 3,587 (7.5%)           | 147 (3.2%)              | 0.193 | 146 (3.1%)                          | 147 (3.2%)              | 0.001 |
| Anxiety                                        | 806 (1.7%)             | 111 (2.4%)              | 0.05  | 108 (2.3%)                          | 111 (2.4%)              | 0.004 |
| Ischemic heart disease                         | 37,591 (78.2%)         | 3,105 (66.6%)           | 0.263 | 3,053 (65.4%)                       | 3,105 (66.6%)           | 0.024 |
| Obstructive sleep apnea                        | 84 (0.2%)              | 10 (0.2%)               | 0.009 | 12 (0.3%)                           | 10 (0.2%)               | 0.009 |
| A1C ordering                                   | 7,449 (15.5%)          | 784 (16.8%)             | 0.035 | 767 (16.4%)                         | 784 (16.8%)             | 0.01  |
| Depression                                     | 1,843 (3.8%)           | 192 (4.1%)              | 0.014 | 207 (4.4%)                          | 192 (4.1%)              | 0.016 |
| Diabetes with peripheral circulatory disorders | 948 (2.0%)             | 116 (2.5%)              | 0.035 | 135 (2.9%)                          | 116 (2.5%)              | 0.025 |
| Diabetes with unspecified complications        | 485 (1.0%)             | 49 (1.1%)               | 0.004 | 53 (1.1%)                           | 49 (1.1%)               | 0.008 |
| Diabetic Nephropathy                           | 130 (0.3%)             | 22 (0.5%)               | 0.033 | 19 (0.4%)                           | 22 (0.5%)               | 0.01  |
| Emergency room visit                           | 9,946 (20.7%)          | 907 (19.4%)             | 0.031 | 911 (19.5%)                         | 907 (19.4%)             | 0.002 |
| Fecal Occult Blood Test                        | 1,996 (4.2%)           | 176 (3.8%)              | 0.02  | 184 (3.9%)                          | 176 (3.8%)              | 0.009 |
| Flu Shot                                       | 4,141 (8.6%)           | 401 (8.6%)              | 0.001 | 392 (8.4%)                          | 401 (8.6%)              | 0.007 |
| Hyperlipidemia                                 | 16,514 (34.4%)         | 1,548 (33.2%)           | 0.025 | 1,545 (33.1%)                       | 1,548 (33.2%)           | 0.001 |
| Hemorrhagic Stroke                             | 268 (0.6%)             | 28 (0.6%)               | 0.006 | 32 (0.7%)                           | 28 (0.6%)               | 0.011 |
| Hypertension                                   | 21,361 (44.5%)         | 2,835 (60.8%)           | 0.331 | 2,832 (60.7%)                       | 2,835 (60.8%)           | 0.001 |
| Ischemic stroke                                | 4,352 (9.1%)           | 478 (10.2%)             | 0.04  | 550 (11.8%)                         | 478 (10.2%)             | 0.049 |
| Diabetic Neuropathy                            | 1,495 (3.1%)           | 165 (3.5%)              | 0.024 | 169 (3.6%)                          | 165 (3.5%)              | 0.005 |
| Prostate specific antigen test                 | 5,246 (10.9%)          | 434 (9.3%)              | 0.054 | 408 (8.7%)                          | 434 (9.3%)              | 0.019 |

|                             |                |               |       |               |               |       |
|-----------------------------|----------------|---------------|-------|---------------|---------------|-------|
| Retinopathy                 | 2,186 (4.5%)   | 280 (6.0%)    | 0.065 | 290 (6.2%)    | 280 (6.0%)    | 0.009 |
| Thyroid function test       | 6,292 (13.1%)  | 694 (14.9%)   | 0.051 | 667 (14.3%)   | 694 (14.9%)   | 0.016 |
| Metabolic panel             | 11,147 (23.2%) | 1,124 (24.1%) | 0.021 | 1,104 (23.7%) | 1,124 (24.1%) | 0.01  |
| Osteoarthritis              | 694 (1.4%)     | 67 (1.4%)     | 0.001 | 64 (1.4%)     | 67 (1.4%)     | 0.005 |
| Peripheral Vascular Disease | 2,651 (5.5%)   | 362 (7.8%)    | 0.09  | 355 (7.6%)    | 362 (7.8%)    | 0.006 |
| Pneumonia                   | 2,525 (5.3%)   | 179 (3.8%)    | 0.068 | 162 (3.5%)    | 179 (3.8%)    | 0.019 |
| Sepsis                      | 503 (1.0%)     | 36 (0.8%)     | 0.029 | 27 (0.6%)     | 36 (0.8%)     | 0.024 |
| Sleep disorder              | 2,461 (5.1%)   | 316 (6.8%)    | 0.07  | 330 (7.1%)    | 316 (6.8%)    | 0.012 |
| Urinary incontinence        | 406 (0.8%)     | 70 (1.5%)     | 0.061 | 72 (1.5%)     | 70 (1.5%)     | 0.004 |
| Smoking                     | 1,734 (3.6%)   | 115 (2.5%)    | 0.067 | 128 (2.7%)    | 115 (2.5%)    | 0.017 |
| Anti-platelets              | 11,031 (23.0%) | 1,127 (24.2%) | 0.028 | 1,148 (24.6%) | 1,127 (24.2%) | 0.01  |
| Antiarrhythmics             | 1,851 (3.9%)   | 148 (3.2%)    | 0.037 | 152 (3.3%)    | 148 (3.2%)    | 0.005 |
| Anticonvulsants             | 3,514 (7.3%)   | 457 (9.8%)    | 0.089 | 468 (10.0%)   | 457 (9.8%)    | 0.008 |
| Antidepressants             | 8,468 (17.6%)  | 950 (20.4%)   | 0.07  | 954 (20.5%)   | 950 (20.4%)   | 0.002 |
| Antiparkinson's medications | 872 (1.8%)     | 136 (2.9%)    | 0.072 | 119 (2.6%)    | 136 (2.9%)    | 0.022 |
| Antipsychotics              | 741 (1.5%)     | 73 (1.6%)     | 0.002 | 78 (1.7%)     | 73 (1.6%)     | 0.008 |
| Benzodiazepines             | 6,112 (12.7%)  | 748 (16.0%)   | 0.095 | 763 (16.4%)   | 748 (16.0%)   | 0.009 |
| Anxiolytics/hypnotics       | 3,763 (7.8%)   | 427 (9.2%)    | 0.047 | 410 (8.8%)    | 427 (9.2%)    | 0.013 |
| Beta blockers               | 20,957 (43.6%) | 1,926 (41.3%) | 0.047 | 1,913 (41.0%) | 1,926 (41.3%) | 0.006 |
| Bisphosphonates             | 2,257 (4.7%)   | 319 (6.8%)    | 0.092 | 342 (7.3%)    | 319 (6.8%)    | 0.019 |
| COPD/asthma meds            | 7,150 (14.9%)  | 812 (17.4%)   | 0.069 | 817 (17.5%)   | 812 (17.4%)   | 0.003 |
| Cox-2 inhibitors            | 3,435 (7.1%)   | 319 (6.8%)    | 0.012 | 307 (6.6%)    | 319 (6.8%)    | 0.01  |
| Creatinine test             | 2,091 (4.4%)   | 223 (4.8%)    | 0.021 | 219 (4.7%)    | 223 (4.8%)    | 0.004 |
| Heparins                    | 371 (0.8%)     | 38 (0.8%)     | 0.005 | 38 (0.8%)     | 38 (0.8%)     | 0     |
| Nitrates                    | 9,804 (20.4%)  | 814 (17.4%)   | 0.075 | 807 (17.3%)   | 814 (17.4%)   | 0.004 |
| NSAIDs                      | 4,442 (9.2%)   | 526 (11.3%)   | 0.067 | 533 (11.4%)   | 526 (11.3%)   | 0.005 |
| Opioids                     | 11,894 (24.8%) | 1,299 (27.8%) | 0.07  | 1,288 (27.6%) | 1,299 (27.8%) | 0.005 |
| Oral anticoagulants         | 4,623 (9.6%)   | 426 (9.1%)    | 0.017 | 405 (8.7%)    | 426 (9.1%)    | 0.016 |
| Oral steroids               | 4,554 (9.5%)   | 487 (10.4%)   | 0.032 | 472 (10.1%)   | 487 (10.4%)   | 0.011 |
| Other lipid lowering drugs  | 4,917 (10.2%)  | 484 (10.4%)   | 0.005 | 457 (9.8%)    | 484 (10.4%)   | 0.019 |
| Atrial fibrillation         | 5,499 (11.4%)  | 427 (9.2%)    | 0.075 | 423 (9.1%)    | 427 (9.2%)    | 0.003 |
| Total number of meds        |                |               | 0.096 |               |               | 0.025 |
| ...mean (Sdev)              | 1.98 (2.16)    | 2.19 (2.25)   |       | 2.13 (2.19)   | 2.19 (2.25)   |       |
| Cardiologist visit          | 29,928 (62.3%) | 2,526 (54.1%) | 0.165 | 2,585 (55.4%) | 2,526 (54.1%) | 0.025 |
| Internal Medicine/Family    | 35,314 (73.5%) | 3,571 (76.5%) | 0.071 | 3,573 (76.6%) | 3,571 (76.5%) | 0.001 |
| Echo                        | 19,496 (40.6%) | 1,589 (34.1%) | 0.135 | 1,638 (35.1%) | 1,589 (34.1%) | 0.022 |
| Age category                |                |               | 0.149 |               |               | 0.031 |
| 55-59                       | 9,747 (20.3%)  | 802 (17.2%)   |       | 839 (18.0%)   | 802 (17.2%)   |       |
| 60-64                       | 11,539 (24.0%) | 985 (21.1%)   |       | 947 (20.3%)   | 985 (21.1%)   |       |
| 65-69                       | 6,262 (13.0%)  | 626 (13.4%)   |       | 655 (14.0%)   | 626 (13.4%)   |       |
| 70-74                       | 6,468 (13.5%)  | 681 (14.6%)   |       | 666 (14.3%)   | 681 (14.6%)   |       |
| ≥75                         | 14,037 (29.2%) | 1,571 (33.7%) |       | 1,558 (33.4%) | 1,571 (33.7%) |       |
| CABG or PCI                 | 5,454 (11.3%)  | 124 (2.7%)    | 0.346 | 111 (2.4%)    | 124 (2.7%)    | 0.018 |

|                          |                |               |       |               |               |       |
|--------------------------|----------------|---------------|-------|---------------|---------------|-------|
| Any diuretic             | 11,396 (23.7%) | 1,342 (28.8%) | 0.115 | 1,325 (28.4%) | 1,342 (28.8%) | 0.008 |
| Ischemic Stroke or TIA   | 5,727 (11.9%)  | 730 (15.6%)   | 0.108 | 783 (16.8%)   | 730 (15.6%)   | 0.031 |
| Calcium channel blockers | 5,386 (11.2%)  | 833 (17.9%)   | 0.189 | 825 (17.7%)   | 833 (17.9%)   | 0.004 |
| Statin                   | 22,441 (46.7%) | 2,104 (45.1%) | 0.032 | 2,073 (44.4%) | 2,104 (45.1%) | 0.013 |
| Colonoscopy              | 2,733 (5.7%)   | 268 (5.7%)    | 0.002 | 262 (5.6%)    | 268 (5.7%)    | 0.006 |

Legend: SD - standardized difference (balance indicated if < 0.1), Sdev – standard deviation, TIA - transient ischemic attack, CABG - coronary artery bypass graft, PCI - percutaneous coronary intervention, COPD – chronic obstructive pulmonary disease, NSAIDs – non-steroidal anti-inflammatory drugs



## Methodology for Selecting Telmisartan

We reviewed all supplemental application approvals for previously approved novel therapeutic agents that occurred between 2005 and 2014 from the publically available Drugs@FDA database.<sup>1</sup> The supplemental indications were classified into three mutually exclusive categories: ‘new indication’, ‘modification’ of an already approved indication, and ‘expansion’ in patient population.<sup>1</sup> New indication meant that no similar use was ever previously approved for the medication. An example of ‘modification’ is a diabetes drug being used to treat the same condition (e.g., diabetes mellitus) as its initial approval, but now it can be used in combination with another diabetes medication. Expansion generally referred to a drug being used to treat the same condition (e.g., diabetes mellitus) but in a different age group (e.g., children with diabetes mellitus).

We identified 138 new indications, 86 modifications to the initial indication, and 66 expansions to the initial indication. We focused on new indications since these require a high level of evidence (i.e., randomized clinical trial) before they are granted.

Of the 138 new indications, 108 (78.3%) of the clinical trials supporting the new indications had a primary outcome that was not identifiable in US longitudinal healthcare databases (e.g., pathology results, change in clinical scores, radiologic tumour response), 12 (8.70%) of the trials did not have an active comparator (i.e., placebo-controlled trials), 4 (2.90%) of the trials were based predominantly on in-hospital medication administration (e.g., post-operative nausea medication, anesthetic medications), and 14 (10.14%) of trials were potentially replicable.

Of the 14 potentially replicable trials we selected telmisartan and did not run analyses on the other 13. Of the remaining 13, most (N=8) were related to low molecular weight heparin

medications or direct oral acting anticoagulants where the initial indication was typically venous thromboembolism prophylaxis, for example, and the new indication was the treatment of venous thromboembolism. Of the remaining five, two had laboratory based outcomes (e.g., change in cholesterol or blood glucose) which are not currently identifiable in most US longitudinal healthcare claims databases, one was an anti-rejection medication (i.e., tacrolimus) to prevent graft rejection following heart transplant, one was a medication (i.e., candesartan) for the treatment of heart failure, and one was an anticoagulant (i.e., bivalirudin) used for patients undergoing percutaneous coronary intervention.

#### Reference

1. Wang B, Kesselheim AS. Characteristics of efficacy evidence supporting approval of supplemental indications for prescription drugs in united states, 2005-14: systematic review. *BMJ*. 2015;351:h4679.
